# Supplementary material for: Repulsive Forces Between Looping Chromosomes Induce Entropy-Driven Segregation
Source: PubMed Central journal article supplement (PMC3014947; doi:10.1371/journal.pone.0014428), 2011-01-04

## Figure S2

Mapping of coarse-grained polymers to physical parameters. Shown are results for a chain length of  $N = 256$  using different looping probabilities. Experimental data shows results from FISH measurements on human chromosome 1 and 11. The chain is mapped to chromosome 11 by assuming one bead to comprise a 400kb-stretch of chromatin. Consistent with the experimental data, this is set equal to 480 nm. Different symbols indicate different looping lifetimes ( $\blacktriangle$ :  $\tau = 0.01\tau_{int}$ ;  $\diamond$ :  $\tau = \tau_{int}$ ;  $\bullet$ :  $\tau = 100\tau_{int}$ , see Materials & Methods). **A.** This panel shows the mean square distance in relation to genomic separation of model and experimental data to assess the quality of the mapping. **B.** The potential of mean force between two model chromosomes in relation to physical distance  $r$  between the centers of mass. The effective potential strongly increases with increasing looping number at a separation of about 2-3  $\mu\text{m}$ , i.e. the size range of the assumed chromosome territories.

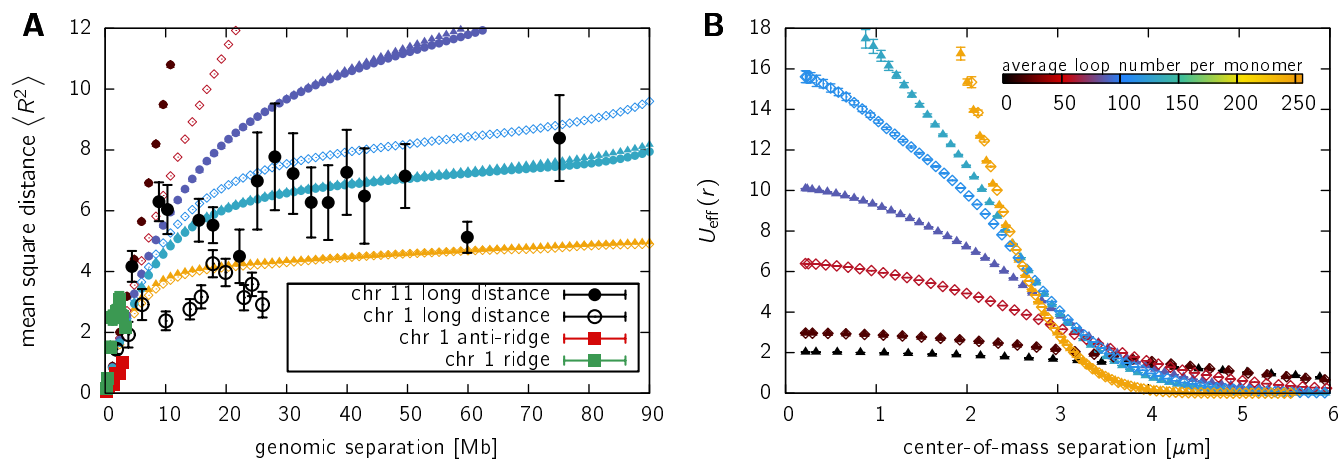

Supplement: pone.0014428.s002.pdf [file pone.0014428.s002.pdf]
